# Supplementary material for: Cardiac remodeling pathways do not accelerate disease onset and severity in a mouse model of PLN-R14del cardiomyopathy
Source: Research Square preprint supplement (doi:10.21203/rs.3.rs-7019046/v1), 2025-07-23
Supplement: Supplementary file 1 [file b08218f2c499328ca05b7929.docx]

**Cardiac remodeling pathways do not accelerate disease onset and severity in a mouse model of PLN-R14del cardiomyopathy**

Liu Sun1, Elisabeth M. Schouten1, Karla. Arevalo Gomez1, Vivian Oliveira Nunes Teixeira1*, Herman H.W. Silljé1*

1Department of Cardiology, University Medical Center Groningen, University of Groningen, the Netherlands

*Correspondence to: Herman H. W. Silljé, PhD. Email: [h.h.w.sillje@umcg.nl](mailto:h.h.w.sillje@umcg.nl)

**Supplementary**

1. **Supplementary figures**


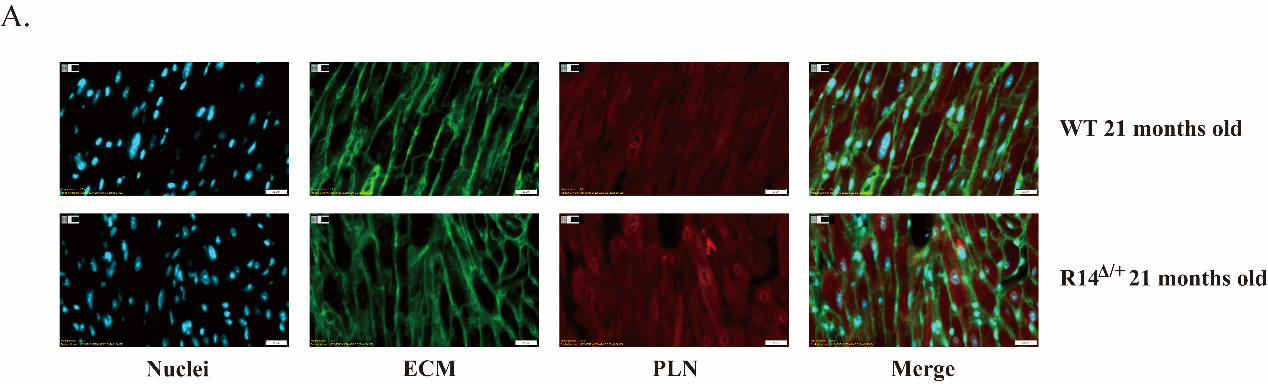


**Fig S1. R14Δ/+ mice exhibit E/SR cluster in LV tissue of 21 months of age**

Representative images immunofluorescence staining of PLN (red), together with extracellular matrix (green) and nuclei (blue) of the LV sections of WT, and R14Δ/+ mice 21 months of age (scale bar 20 µm).


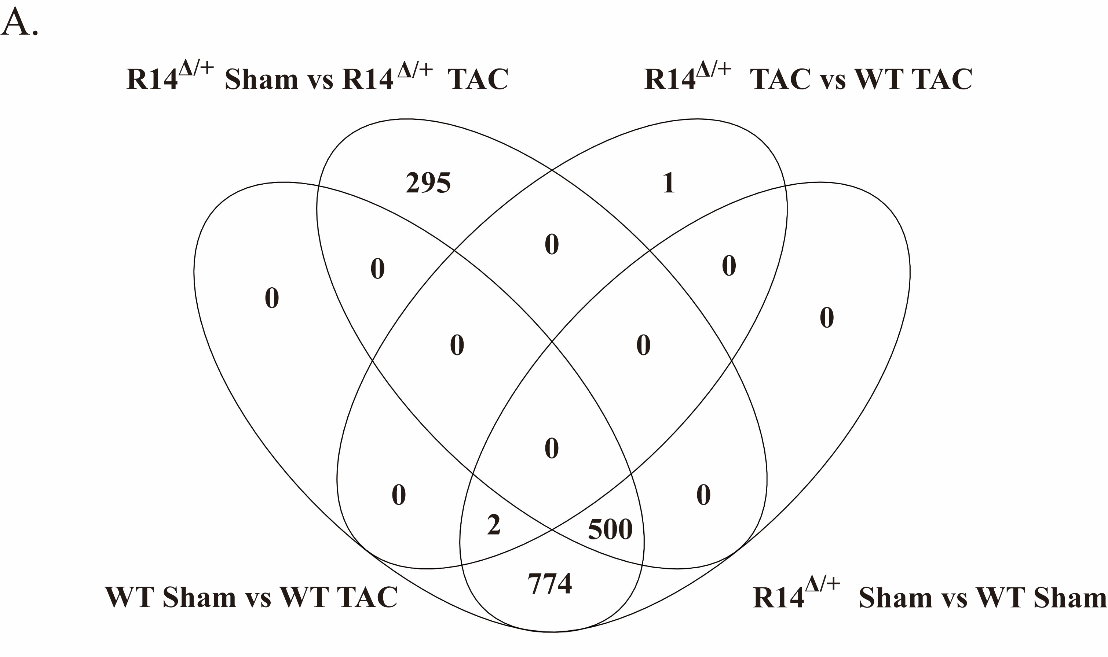


**Fig S2. Gene expressed differently between TAC and Sham groups**

Distinct patterns of gene expression between WT TAC versus WT sham and R14Δ/+ TAC versus R14Δ/+ sham. No separation between WT TAC versus. R14Δ/+ TAC, and WT sham versus. R14Δ/+ sham were observed.


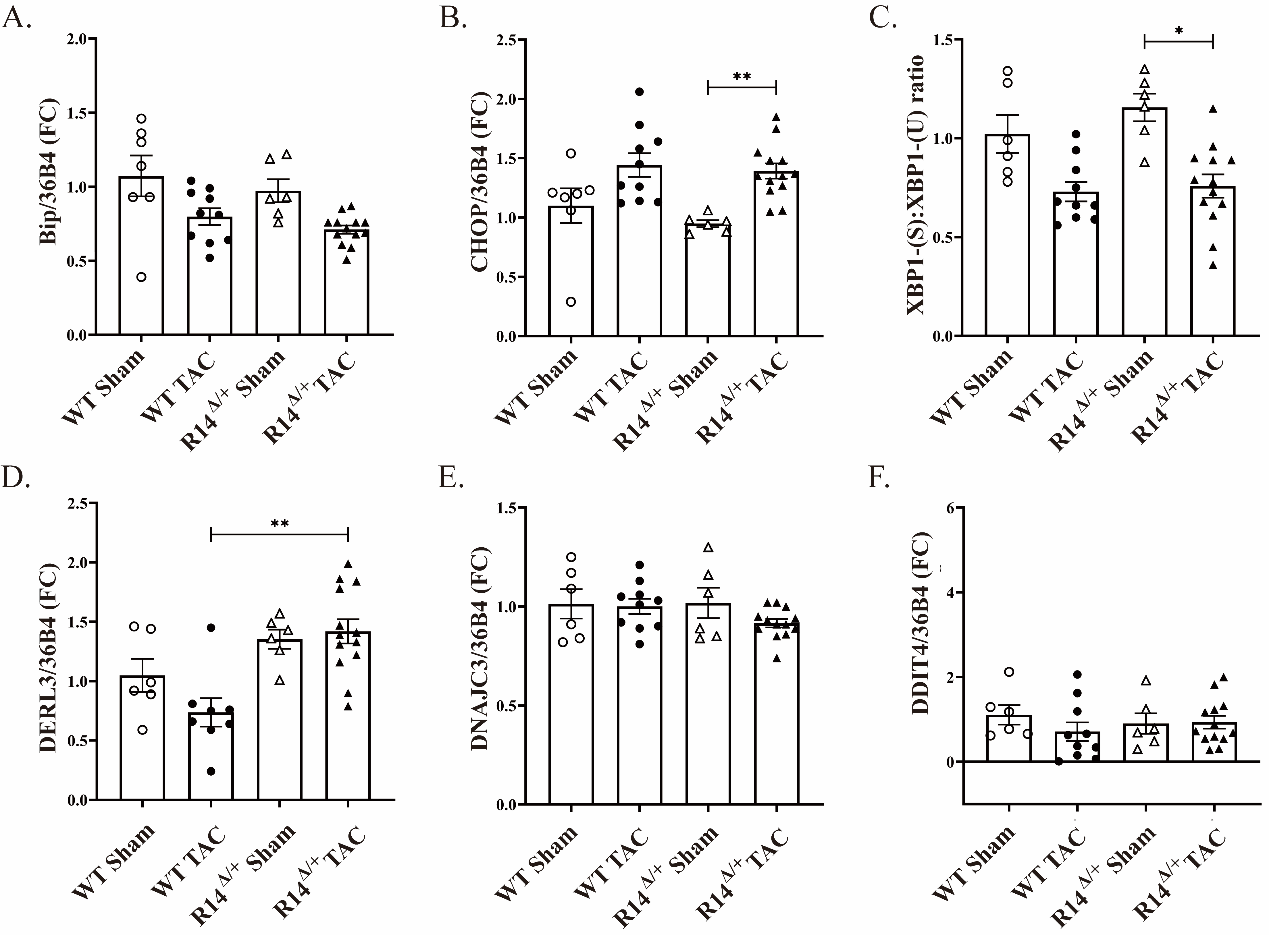


**Figure S3. TAC did not induce ER stress in WT and PLN-R14Δ/+** **mice**

The relative ER related mRNA expressed in LV tissue. The significance of data was analyzed using Kruskal-Wallis test followed by Dunn’s multiple comparisons test. *P<0.05, **p<0.01.

**Supplementary tables**

**Table S1. Primer sequences used for RT-PCR**

| Gene | Protein |  | Sequence |
| --- | --- | --- | --- |
| PLN | phospholamban | Forward  Reverse | GACGATCACCGAAGCCAAG  CGAGCGAGTGAGGTATTGC |
| SERCA2a | Sarcoplasmic/endoplasmic reticulum Ca2+-ATPase | Forward  Reverse | TCAGTATGACGGGCTTGTAG  CGGTAGCTTCTCCAACTTTC |
| NPPA | Atrial Natriuretic Peptide | Forward  Reverse | GCTTCCAGGCCATATTGGAG  GGTGGTCTAGCAGGTTCTTG |
| Timp1 | Tissue Inhibitor of Metalloproteinases-1 | Forward  Reverse | CAACGAGACCACCTTATACC  CATATCCACAGAGGCTTTCC |
| Col1a1 | Collagen type 1 alpha 1 chain | Forward  Reverse | AGAGCATGACCGATGGATTC  CGCTGTTCTTGCAGTGATAG |
| Rplp0 (36B4) | Ribosomal protein, large P0 | Forward  Reverse | AACGGGTACAAACGAGTC  AGATGGATCAGCCAAGAAG |
| Hspa5 | Binding-immunoglobulin protein | Forward  Reverse | TGCAGCAGGACATCAAGTTC  GTTTGCCCACCTCCAATATC |
| CHOP  (Ddit3) | CCAAT/enhancer-binding homologous protein | Forward  Reverse | GGGCACCTATATCTCATCCC  GGGCCATAGAACTCTGACTG |
| Xbp1 s | X-box binding protein 1 spliced | Forward  Reverse | CTGAGTCCGAATCAGGTGCAG  GTCCATGGGAAGATGTTCTGG |
| Xbp1 u | X-box binding protein 1 unspliced | Forward  Reverse | CCGCAGCACTCAGACTATG  GGTAGACCTCTGGGAGTTC |
| DERL3 | Derlin-3 | Forward  Reverse | CCTCGTGGACCTGCTGG  GGTCTGCAGGAGCCTCTTG |
| DNAJC3 | DnaJ heat shock protein family (Hsp40) member C3 | Forward  Reverse | CGACGCCTTATCACAGTTTC  CGGCAGTAAAGTCCATCTTC |
| DDIT4 | regulated in development and DNA damage responses 1 | Forward  Reverse | GGATGGGGTGTCGTTGCCCG  GGCAGCTCTTGCCCTGCTCC |

**Table S2. Antibodies used for Western blot**

List of primary antibodies used in this study

| Primary antibody | Host | Cat. No. | Supplier | Dilution | Blocking buffer | Molecular weight  (kDa) |
| --- | --- | --- | --- | --- | --- | --- |
| Anti-PLN | Rabbit | 14562S | Cell Signalling | 1:1,000 | BSA | 12 and 24 |
| Anti-SERCA | Mouse | Ab2861 | Abcam | 1:1,000 | Milk | 110 |

List of secondary antibodies used in this study

| Secondary antibody | Antigen | Label | Cat. No | Supplier | Dilution |
| --- | --- | --- | --- | --- | --- |
| Rabbit anti-mouse | Mouse | HRP | P0260 | Dako | 1:2,000 |
| Goat anti-rabbit | Rabbit | HRP | P044801 | Dako/Agilent | 1:2,000 |

**Table S3. Common Genes expressed in positive enriched biological process**

|  | Term name | Gene in WT TAC vs WT sham | Gene in R14Δ/+ TAC vs R14Δ/+ sham |
| --- | --- | --- | --- |
| 1 | monoatomic ion transport | Adcyap1r1,Anxa5,Aplnr,Bak1,Bmp4,Ccl21a,Ccr5,Cd63,Clic1,Cx3cl1,Ednrb,F2r,Fhl1,Fxyd5,Hes1,Lgals3,Pkd1,Pkd2,Plcg2,Prnp,Ptk2b,S100a6,Scn1b,Serpine2,Slc1a3,Slc38a2,Slc39a6,Tfrc,Ace,Anxa2,Atp6v0a4,Atp8b1,Bcl2,Calhm5,Ccn2,Clic5,Edn3,Fxyd6,Gnao1,Igf1,Kif5b,Mmgt2,Nppa,Panx1,Piezo2,Rrad,Sfxn1,Tgfb2,Tspo | Adora2a,Adra1a,Akt2,Camk2a,Clcn1,Cox7a1,Crhr2,Hcn4,Kcnj2,Kcnj3,Kcnj5,Klhl3,Maob,P2ry1,Scn4b,Slc22a3,Ano10,Atp1a2,Atp2a2,Atp5pf,Cngb3,Dhrs7c,Gstm7,Kcne1,Kcnip2,Kcnv2,mt-Nd5,Slc20a2,Slc25a4,Slc25a12,Slc25a22,Slc41a1,Strit1 |
| 2 | monoatomic cation transport | Adcyap1r1,Anxa5,Aplnr,Bak1,Bmp4,Ccl21a,Ccr5,Cd63,Cx3cl1,Ednrb,F2r,Fhl1,Hes1,Lgals3,Pkd2,Plcg2,Prnp,Ptk2b,Serpine2,Slc1a3,Slc38a2,Slc39a6,Tfrc,Ace,Anxa2,Atp6v0a4,Bcl2,Calhm5,Ccn2,Edn3,Gnao1,Igf1,Kif5b,Mmgt2,Nppa,Panx1,Piezo2,Pkd1,Rrad,Scn1b,Sfxn1,Tgfb2,Tspo | Adora2a,Adra1a,Akt2,Camk2a,Cox7a1,Crhr2,Hcn4,Kcne1,Kcnj2,Kcnj3,Kcnj5,Klhl3,mt-Nd5,Scn4b,Slc20a2,Slc25a22,Ano10,Atp1a2,Atp2a2,Atp5pf,Cngb3,Dhrs7c,Gstm7,Kcnip2,Kcnv2,Slc25a4,Slc25a12,Slc41a1,Strit1 |
| 3 | metal ion transport | Adcyap1r1,Anxa5,Aplnr,Bak1,Bmp4,Ccl21a,Ccr5,Cd63,Cx3cl1,Ednrb,F2r,Fhl1,Hes1,Lgals3,Pkd2,Plcg2,Prnp,Ptk2b,Serpine2,Slc1a3,Slc38a2,Slc39a6,Tfrc,Ace,Anxa2,Bcl2,Ccn2,Edn3,Gnao1,Igf1,Kif5b,Mmgt2,Nppa,Panx1,Pkd1,Rrad,Scn1b,Sfxn1,Tgfb2,Tspo | Adora2a,Adra1a,Akt2,Camk2a,Crhr2,Hcn4,Kcne1,Kcnj2,Kcnj3,Kcnj5,Scn4b,Atp1a2,Atp2a2,Dhrs7c,Gstm7,Kcnip2,Kcnv2,Klhl3,Slc20a2,Slc25a12,Slc41a1,Strit1 |
| 4 | regulation of blood circulation | Cx3cl1,Ednrb,Egfr,F2r,Hif1a,Hsp90aa1,Itga9,Scn1b,Shox2,Ace,App,Ccn2,Edn3,Gnao1,Hbegf,Mmp2,Myh7,Nppa,Svep1,Tgfb2 | Adra1a,Adra1b,Alox5,Crhr2,Hcn4,Kcne1,Kcnj2,Kcnj5,Rgs2,Rnf207,Scn4b,Tbx5,Apln,Atp1a2,Atp2a2,Atp5pf,Hopx,Kcnip2,Strit1,Tnni3 |
| 5 | regulation of monoatomic ion transport | Adcyap1r1,Aplnr,Bak1,Bmp4,Cd63,Cx3cl1,F2r,Fhl1,Fxyd5,Hes1,Lgals3,Pkd2,Prnp,Ptk2b,Scn1b,Serpine2,Ace,Atp8b1,Bcl2,Edn3,Fxyd6,Gnao1,Igf1,Kif5b,Nppa,Rrad,Tgfb2,Tspo | Adora2a,Akt2,Camk2a,Crhr2,Kcnj2,Kcnj5,Maob,P2ry1,Scn4b,Atp1a2,Dhrs7c,Gstm7,Kcne1,Kcnip2,Kcnj3,Strit1 |
| 6 | muscle system process | Bmp4,Ccn4,Col14a1,Cttn,Dbn1,Ednrb,F2r,Mybpc2,Myl1,Myl6,Ptger4,Scn1b,Tnfrsf1a,Tnfrsf1b,Acta1,Atp8a2,Ccn2,Comp,Edn3,Hsp90aa1,Igf1,Igfbp5,Myh7,Nppa,Nppb,Pi16,Sulf1,Tpm3,Tpm4 | Adra1a,Adra1b,Clcn1,Hcn4,Kcnj2,Kcnj5,Meis1,P2ry1,Rnf207,Scn4b,Tnni2,Atp1a2,Atp2a2,Kcne1,Kcnip2,Rgs2,Slc25a4,Strit1,Tnni3 |
| 7 | circulatory system process | Amot,Cx3cl1,Ednrb,Egfr,F2r,Gpx1,Hif1a,Hsp90aa1,Id2,Itga9,Myl1,Nppb,Plod3,Scn1b,Shox2,Sod3,Ace,App,Ccn2,Col1a2,Comp,Ddah1,Edn3,Emilin1,Gnao1,Hbegf,Mmp2,Myh7,Nox4,Nppa,Postn,Scpep1,Svep1,Tgfb2 | Adora2a,Adra1a,Adra1b,Alox5,Crhr2,Hcn4,Kcnj2,Kcnj5,P2ry1,Rnf207,Scn4b,Slc27a1,Tbx5,Tnni2,Apln,Atp1a2,Atp2a2,Atp5pf,Emilin2,Hopx,Kcne1,Kcnip2,Rgs2,Strit1,Tnni3 |
| 8 | phosphorus metabolic process | Adarb1,Adcy7,Adcyap1r1,Aplnr,Bak1,Bmp4,Cda,Ckb,Crlf1,Cx3cl1,Cx3cr1,Dclk1,Ednrb,Eef1a1,Egfr,Enpp1,Fgfr1,Gba1,Grk5,Hes1,Hif1a,Inhba,Itga6,Ldlr,Lrp8,Lrrk1,Mapk4,Nudt16,Pkd1,Pla2g4a,Plcg2,Prkag2,Prkcd,Ptger4,Ptk2b,Ptprf,Ptprn,Rap2b,S1pr2,Sox9,Syk,Tfrc,Tgfbr1,Thbs1,Tlr4,Tnfrsf1a,Upp1,Acot9,Anxa2,App,Bcl2,Ccn2,Ccnd2,Cd44,Cdkl2,Cfh,Clec4n,Dhdds,Dynll1,Ehd4,Fbln1,Fn1,Fndc1,Hbegf,Hsp90aa1,Igf1,Irak4,Lox,Mical1,Myh7,Nmrk2,Nox4,Nppa,Nppb,Nuak1,Nudt18,Nupr1,Pfkp,Ppm1e,Prnp,Sfrp1,Sfrp2,Srpx2,Thbs4,Tmem119,Tspan9,Tspo,Uck2,Ugp2 | Acot1,Akt2,Camk2a,Dusp18,Enpp2,Entpd5,Il15,Isyna1,Mylk4,Ndufb11,P2ry1,Pdk2,Pdp2,Pim1,Pla2g5,Rgs2,Sema4d,Slc25a42,Slc27a1,Sord,Wnk2,Acaa2,Acot2,Acss1,Apln,Atp1a2,Atp5pf,Ces1d,Dgat2,Eno3,Epha4,Fbp2,Fitm1,Hadha,Impa2,mt-Nd5,Ndufa5,Nme6,Pink1,Ppm1k,Ppm1l,Sbk2,Slc25a12 |
| 9 | blood circulation | Amot,Cx3cl1,Ednrb,Egfr,F2r,Gpx1,Hif1a,Hsp90aa1,Id2,Itga9,Myl1,Nppb,Plod3,Scn1b,Shox2,Sod3,Ace,App,Ccn2,Col1a2,Comp,Ddah1,Edn3,Emilin1,Gnao1,Hbegf,Mmp2,Myh7,Nppa,Postn,Scpep1,Svep1,Tgfb2 | Adora2a,Adra1a,Adra1b,Alox5,Crhr2,Hcn4,Kcnj2,Kcnj5,P2ry1,Rgs2,Rnf207,Scn4b,Tbx5,Tnni2,Apln,Atp1a2,Atp2a2,Atp5pf,Emilin2,Hopx,Kcne1,Kcnip2,Strit1,Tnni3 |
| 10 | phosphate-containing compound metabolic process | Adarb1,Adcy7,Adcyap1r1,Aplnr,Bak1,Bmp4,Cda,Ckb,Crlf1,Cx3cl1,Cx3cr1,Dclk1,Ednrb,Eef1a1,Egfr,Enpp1,Fgfr1,Gba1,Grk5,Hes1,Hif1a,Inhba,Itga6,Ldlr,Lrp8,Lrrk1,Mapk4,Nudt16,Pkd1,Pla2g4a,Plcg2,Prkag2,Prkcd,Ptger4,Ptk2b,Ptprf,Ptprn,Rap2b,S1pr2,Sox9,Syk,Tfrc,Tgfbr1,Thbs1,Tlr4,Tnfrsf1a,Upp1,Acot9,Anxa2,App,Bcl2,Ccn2,Ccnd2,Cd44,Cdkl2,Cfh,Clec4n,Dhdds,Dynll1,Ehd4,Fbln1,Fn1,Fndc1,Hbegf,Hsp90aa1,Igf1,Irak4,Lox,Mical1,Myh7,Nmrk2,Nox4,Nppa,Nppb,Nuak1,Nudt18,Nupr1,Pfkp,Ppm1e,Prnp,Sfrp1,Sfrp2,Srpx2,Thbs4,Tmem119,Tspan9,Tspo,Uck2,Ugp2 | Acot1,Akt2,Camk2a,Dusp18,Enpp2,Entpd5,Il15,Isyna1,Mylk4,Ndufb11,P2ry1,Pdk2,Pdp2,Pim1,Pla2g5,Rgs2,Sema4d,Slc25a42,Slc27a1,Sord,Wnk2,Acaa2,Acot2,Acss1,Apln,Atp1a2,Atp5pf,Ces1d,Dgat2,Eno3,Epha4,Fbp2,Fitm1,Hadha,Impa2,mt-Nd5,Ndufa5,Nme6,Pink1,Ppm1k,Ppm1l,Sbk2,Slc25a12 |
| 11 | regulation of system process | Ccn4,Cttn,Cx3cl1,Ednrb,Egfr,F2r,Fgfr1,Gba1,Hif1a,Inhba,Nppb,Ptger4,Ptk2b,S1pr2,Scn1b,Shox2,Tnfrsf1a,Tnfrsf1b,Ace,App,Ccn2,Dbn1,Ecrg4,Edn3,Gnao1,Hbegf,Hsp90aa1,Igf1,Igfbp5,Itga9,Mmp2,Myh7,Nppa,Pi16,Svep1,Tgfb2,Tspo | Adra1a,Adra1b,Alox5,Crhr2,Hcn4,Kcne1,Kcnj2,Kcnj5,Rgs2,Rnf207,Scn4b,Tbx5,Tnni3,Tppp,Apln,Atp1a2,Atp2a2,Atp5pf,Hopx,Kcnip2,Slc25a4,Slc25a12,Strit1 |
| 12 | establishment of localization | Ildr2,Adcyap1r1,Anxa5,Aplnr,Arfgap3,Arhgap17,Arl4c,Aspscr1,Bak1,Bmp4,Ccl21a,Ccr5,Cd9,Cd63,Cnn2,Cttn,Cttnbp2nl,Cx3cl1,Dbn1,Ecrg4,Ednrb,Egfr,Enpp1,F2r,Fbln5,Fgfr1,Fhl1,Fxyd5,Gas1,Gpm6b,Hes1,Hif1a,Il4ra,Inhba,Lbp,Ldlr,Lgals3,Lima1,Lrp8,Ltbp4,Map1a,Map1b,Mrc2,Niban2,Nkd2,Ophn1,Pkd1,Pkd2,Pla2g4a,Plcg2,Pls3,Pou2f2,Prkar1a,Prkcd,Pros1,Ptger4,Ptk2b,Rab34,Rcn3,S100a6,S100a10,Scn1b,Serpine2,Slc1a3,Slc25a30,Slc38a2,Slc39a6,Star,Syk,Tfrc,Thbs1,Tlr4,Tnfrsf1a,Tnfrsf1b,Tnfrsf11a,Abra,Ace,Actn4,Ankrd1,Anxa1,Anxa2,Ap1s2,Apod,App,Aqp8,Atp6v0a4,Atp8a2,Atp8b1,Bcl2,Calhm5,Ccn2,Clic1,Clic5,Col1a1,Comp,Comt,Creb3l2,Cygb,Dipk2a,Dpysl2,Dync1li1,Dynll1,Edn3,Ehd4,Fndc1,Fxyd6,Gnao1,Grip1,Hsp90aa1,Ift122,Igf1,Kdelr3,Kif5b,Lman1l,Lpar1,Lrp1,Mical1,Mmgt2,Msn,Nppa,Nucb2,Panx1,Pcdh17,Phldb2,Piezo2,Prnp,Ptprn,Rab7b,Rab27b,Rab31,Rbp1,Rhoj,Rrad,Rtn4,Serpine1,Sfrp1,Sfxn1,Spcs3,Ssc5d,Tgfb2,Tgfb3,Tgm2,Tspan9,Tspan17,Tspo,Txnip,Uchl1,Zdhhc2 | Adora2a,Adra1a,Akt2,Alox5,Aqp7,Bcl2l11,Car14,Cenpf,Clcn1,Cox7a1,Crhr2,Dusp18,Emc4,Enpp2,Hcn4,Il15,Kcnj2,Kcnj3,Kcnj5,Maob,Nectin2,P2ry1,Pim1,Pola2,Rgs2,Ruvbl2,Scn4b,Selenbp1,Slc7a1,Slc22a3,Slc25a42,Slc27a1,Spc24,Ston2,Syvn1,Tmed1,Wrap53,Acaa2,Ano10,Apln,Atp1a2,Atp2a2,Atp5pf,Camk2a,Ces1d,Cngb3,Dhrs7c,Gstm7,Hadh,Ift81,Kcne1,Kcnip2,Kcnv2,Klhl3,Lrpprc,mt-Nd5,Pex6,Pink1,Pla2g5,Ppm1k,Preb,Rtn2,Slc20a2,Slc25a4,Slc25a12,Slc25a22,Slc41a1,Stard10,Strit1,Syt7,Ttll1,Whrn |
| 13 | transport | Kif5b,Pls3,Scn1b,Mical1,Ccn2,Igf1,Rtn4,Prkar1a,Ace,Cygb,Hif1a,Fbln5,Tgfb3,Hsp90aa1,Atp8a2,Ptprn,Map1a,Ehd4,Edn3,Anxa5,Apod,App,Fhl1,Clic5,Rab27b,Anxa1,Ankrd1,Cd63,Lrp8,Uchl1,Ift122,Comt,S100a6,Col1a1,Slc1a3,Aqp8,Msn,Ap1s2,Sfrp1,Star,Gnao1,Comp,Rrad,Panx1,Anxa2,Dync1li1,Pkd1,Bcl2,Bak1,F2r,Mmgt2,Map1b,Actn4,Lman1l,Rab31,Piezo2,Nppa,Tspo,Abra,Aplnr,Dipk2a,Rbp1,Rhoj,Fxyd6,Fndc1,Pkd2,Grip1,Ssc5d,Pcdh17,Enpp1,Serpine1,Tgm2,Txnip,Atp6v0a4,Lpar1,Tlr4,Tgfb2,Lrp1,Ltbp4,Prnp,Clic1,Pou2f2,Dynll1,Fxyd5,Kdelr3,Lbp,Rcn3,Egfr,Mrc2,Syk,Sfxn1,Nkd2,Bmp4,Prkcd,Slc25a30,Dpysl2,Ednrb,Slc38a2,Ecrg4,Serpine2,Tnfrsf11a,Niban2,Hes1,Tfrc,Pros1,Lima1,Slc39a6,Aspscr1,Tnfrsf1b,Adcyap1r1,Tnfrsf1a,Cd9,Tspan9,Rab34,Cnn2,Nucb2,Il4ra,Arhgap17,Cttn,Ophn1,Gpm6b,Fgfr1,Cx3cl1,Ldlr,Ptk2b,Cttnbp2nl,Arl4c,Calhm5,Lgals3,Rab7b,Gas1,Arfgap3,Pla2g4a,Inhba,S100a10,Plcg2,Dbn1,Creb3l2,Zdhhc2,Atp8b1,Ptger4,Thbs1,Ildr2,Ccl21a,Ccr5 | Adora2a,Adra1a,Akt2,Alox5,Aqp7,Bcl2l11,Camk2a,Car14,Cenpf,Clcn1,Cox7a1,Crhr2,Enpp2,Hcn4,Il15,Kcnj2,Kcnj3,Kcnj5,Maob,P2ry1,Pim1,Pola2,Preb,Rgs2,Scn4b,Selenbp1,Slc7a1,Slc22a3,Slc25a42,Slc27a1,Ston2,Syvn1,Tmed1,Acaa2,Ano10,Apln,Atp1a2,Atp2a2,Atp5pf,Ces1d,Cngb3,Dhrs7c,Gstm7,Hadh,Ift81,Kcne1,Kcnip2,Kcnv2,Klhl3,Lrpprc,mt-Nd5,Pex6,Pink1,Pla2g5,Ppm1k,Rtn2,Slc20a2,Slc25a4,Slc25a12,Slc25a22,Slc41a1,Stard10,Strit1,Syt7,Ttll1 |
| 14 | localization | Kif5b,Etv5,Scn1b,Ccn2,Igf1,Rtn4,Prkar1a,Ace,Cygb,Fbln5,Tgfb3,Hsp90aa1,Tspan17,Ptprn,Cfh,Fbn1,Map1a,Ehd4,Edn3,Anxa5,Dclk1,Apod,App,Fhl1,Clic5,Myl12a,Rab27b,Anxa1,Ankrd1,Cd63,Lrp8,Uchl1,Ptn,Ift122,Comt,S100a6,Col1a1,Slc1a3,Aqp8,Msn,Ap1s2,Sfrp1,Star,Gnao1,Comp,Anxa2,Dync1li1,Bcl2,F2r,Tmsb4x,Map1b,Spcs3,Actn4,Lman1l,Rab31,Piezo2,Nppa,Tspo,Abra,Dipk2a,Rbp1,Rhoj,Fxyd6,Fndc1,Pkd2,Grip1,Ssc5d,Pcdh17,Enpp1,Serpine1,Tgm2,Atp6v0a4,Lpar1,Tlr4,Tgfb2,Lrp1,Ltbp4,Nbl1,Prnp,Tmsb10,Dynll1,Fxyd5,Kdelr3,Pls3,Mical1,Mrc2,Hif1a,Syk,Sfxn1,Nkd2,Atp8a2,Dpysl2,Serpine2,Hes1,Lima1,Tspan5,Tspan9,Plod3,Nucb2,Gpm6b,Rrad,Panx1,Ldlr,Pkd1,Bak1,Ptk2b,Mmgt2,Calhm5,Lgals3,Gas1,Pla2g4a,Amot,S100a10,Aplnr,Phldb2,Plcg2,Txnip,Creb3l2,Atp8b1,Ccl21a,Clic1,Pou2f2,Lbp,Rcn3,Egfr,Nin,Bmp4,Prkcd,Slc25a30,Ednrb,Slc38a2,Ecrg4,Tnfrsf11a,Niban2,Tfrc,Pros1,Slc39a6,Aspscr1,Gba,Tnfrsf1b,Adcyap1r1,Tnfrsf1a,Cd9,Sox9,Mmp14,Rab34,Cnn2,Il4ra,Arhgap17,Ldaf1,Cttn,Ophn1,Fgfr1,Cx3cl1,Cttnbp2nl,Arl4c,Rab7b,Arfgap3,Inhba,Dbn1,Iqce,Dchs1,Cntln,Zdhhc2,Ptger4,Thbs1,Ildr2,Ccr5 | Adora2a,Adra1a,Akt2,Alox5,Aqp7,Bcl2l11,Camk2a,Car14,Cenpf,Clcn1,Cox7a1,Crhr2,Dusp18,Emc4,Enpp2,Hcn4,Il15,Kcnj2,Kcnj5,Lama5,Maob,Nectin2,P2ry1,Pim1,Pola2,Rgs2,Ruvbl2,Scn4b,Selenbp1,Slc7a1,Slc22a3,Slc25a42,Slc27a1,Spc24,Ston2,Syvn1,Tmed1,Wdr45,Wrap53,Acaa2,Ano10,Apln,Atp1a2,Atp2a2,Atp5pf,Ces1d,Cngb3,Dgat2,Dhrs7c,Fitm1,Gstm7,Hadh,Ift81,Kcne1,Kcnip2,Kcnj3,Kcnv2,Klhl3,Lrpprc,mt-Nd5,Pex6,Pink1,Pla2g5,Ppm1k,Preb,Rtn2,Slc20a2,Slc25a4,Slc25a12,Slc25a22,Slc41a1,Stard10,Strit1,Syt7,Ttll1,Whrn |
| 15 | organonitrogen compound metabolic process | Fbln1,Dio2,Crlf1,Sulf1,Gpx3,Ccn2,Nuak1,Igf1,Tnip1,Rtn4,Ace,Trim47,Pfkp,Aopep,Thbs4,Samd4,Pdlim2,Itih5,Tspan17,Casp12,Igfbp5,Fn1,Ptprn,Pam,Cfh,Uck2,Vim,Pamr1,Ehd4,Sfrp2,Apod,App,Hbegf,Lox,Ddah1,Lrp8,Nppb,Uchl1,Cdkl2,Pcolce,Gxylt2,Ccnd2,Comt,Loxl3,Timp1,Grk5,Nmrk2,Cd44,Nox4,Nupr1,Cpxm2,Msn,Sfrp1,Adcy7,Mmp2,Comp,Anxa2,Dnaja4,Bcl2,Rpl3,Gpx1,F2r,Nlrc3,Cx3cr1,Myh7,Tmem119,Nppa,Tspo,Otulin,Fndc1,Qsox1,Loxl2,Adamts2,Hspb6,Enpp1,Tgm2,Tlr4,Tgfb2,Lrp1,Prnp,Ddah2,Tgfbr1,Dhdds,Mical1,Egfr,Adarb1,Upp1,Aebp1,Galc,Hif1a,Hsp90aa1,Traf3,Syk,Nkd2,Prkcd,Tars,Ecrg4,Mgat4a,Serpine2,Map1a,Dclk1,Hes1,Masp1,Clec4n,Adamts10,Ppic,Mapk4,Acot9,Rnf115,Ctsk,Tspan5,Hacd4,Tnfrsf1b,Prkag2,Mmp23,Tnfrsf1a,Tspan9,Scpep1,Sox9,Usp32,Mmp14,Ckb,Il17ra,Plod3,Slc1a3,Nucb2,Ophn1,Sh3bgrl,Psmb10,Ldlr,Pkd1,Chpf,Bak1,Ptk2b,Irak4,Gas1,Spcs3,C1ra,Pla2g4a,Hectd2,Inhba,S100a10,Serpinb6b,Naalad2,Ctla2a,Aplnr,Nudt18,Ppm1e,Spsb4,Plcg2,Ttll7,Rap2b,Serpine1,Eef1a1,Dsel,Dap,Zdhhc2,Thbs1,Ccl21a,Col4a3,Lrrk1,Rcn3,Phlda1,Bmp4,Ednrb,Tfrc,Aspscr1,Gba,Cda,Tgfb1i1,Fgfr1,Cx3cl1,Nudt16,Numbl,S1pr2,Dact1,Ptprf,P3h2,Rbms3,Ptger4 | P3h4,Atp1a2,Unc45b,Dglucy,Acot2,Entpd5,Aldh6a1,Mtr,Ttll1,Adhfe1,Epha4,Rgs2,Slc25a12,Acss1,P2ry1,Ppm1l,Oplah,Atp5pf,Ndufa5,Lrpprc,Pfdn6,Camk2a,Cpt2,Pink1,Gstk1,Rtn2,Dbt,Rpl3l,Crhr2,Gstm7,Akt2,Etfb,Dgat2,Ndufb11,Mmp15,Slc27a1,Bckdhb,Ces1d,Eno3,mt-Nd5,Lgals4,Pla2g5,Acot1,Acaa2,Ppm1k,Wnk2,Hjv,Pdk2,Mrps35,Kyat3,Gcat,Klhl3,Mtif2,Mif4gd,Sema4d,Tppp,Enpp2,Spta1,Aldh9a1,Eif3m,Mme,Gpt,Sharpin,Ppil1,Pim1,Anks1,Carnmt1,Syvn1,Rps6,Sbk2,Slc25a42,Fah,Gpt2,Il15,Adamts7,Nme6,Hhatl,Pdp2,Ggcx,Gzmm,Mylk4,Dusp18,Qsox2,Kyat1,Neurl2,Maob |
| 16 | regulation of transport | Adcyap1r1,Anxa5,Aplnr,Aspscr1,Bak1,Bmp4,Ccl21a,Cd63,Cnn2,Cttnbp2nl,Cx3cl1,Dpysl2,Egfr,Enpp1,F2r,Fgfr1,Fhl1,Fxyd5,Gpm6b,Hes1,Hif1a,Il4ra,Inhba,Lbp,Lgals3,Map1b,Pkd2,Pla2g4a,Plcg2,Pls3,Prkcd,Pros1,Ptger4,Ptk2b,S100a10,Serpine2,Syk,Thbs1,Tlr4,Tnfrsf1a,Tnfrsf1b,Tnfrsf11a,Ace,Actn4,Ankrd1,Anxa1,Anxa2,Apod,App,Atp8a2,Atp8b1,Bcl2,Dbn1,Dync1li1,Dynll1,Ecrg4,Edn3,Ehd4,Fndc1,Fxyd6,Gas1,Gnao1,Hsp90aa1,Igf1,Kif5b,Lpar1,Lrp1,Mical1,Msn,Nppa,Nucb2,Ophn1,Prkar1a,Prnp,Rab27b,Rrad,Rtn4,Scn1b,Serpine1,Sfrp1,Slc38a2,Tgfb2,Tgfb3,Tgm2,Tspo,Zdhhc2 | Adora2a,Akt2,Alox5,Camk2a,Crhr2,Il15,Kcne1,Kcnj2,Kcnj3,Kcnj5,Maob,P2ry1,Pim1,Rgs2,Rtn2,Scn4b,Ston2,Acaa2,Apln,Atp1a2,Atp2a2,Atp5pf,Ces1d,Dhrs7c,Gstm7,Hadh,Kcnip2,Pink1,Slc25a4,Slc25a22,Strit1,Syt7 |
| 17 | cellular process | Crip1,Kif5b,Plekho1,Ppfibp1,Sparc,Dcn,Ccn2,Rtn4,Pfkp,Aspn,Vcan,Thbs4,Col14a1,Col5a2,Col3a1,Igfbp5,Pam,Cfh,Uck2,Vim,Xirp2,Fbn1,Ccn5,Postn,Sfrp2,Ccdc80,Fstl1,Enah,Clic5,Pi16,Myl12a,Dpysl3,Lox,Ankrd1,Col15a1,Angptl7,Mxra8,Uchl1,Col1a2,Pcolce,Mfap5,Emp1,Ccnd2,Loxl3,Serpinf1,S100a6,Timp1,Col1a1,Ugp2,Ltbp2,Nmrk2,Col4a1,Col4a2,Mmp2,Crispld2,Comp,Acta1,Itgbl1,Bcl2,Rpl3,Nrap,Myh7,Nppa,Cilp,Ecm2,Fxyd6,Col8a1,Fibin,Igfbp7,Hspb6,Tgm2,Itga9,Prune2,Tgfb2,Synpo2l,Lrrc17,Fgl2,Lrp1,Ltbp4,Prnp,Fbln1,Dio2,Crlf1,Nav1,Actn1,Cd34,Nuak1,Unc5b,Col6a2,Fstl3,Tnip1,Prkar1a,Ace,Cygb,Tgfb3,Samd4,Casp12,Fn1,Ptprn,Des,Col5a1,Frzb,Ehd4,Edn3,S100a11,Apod,App,Rcan1,Igfbp6,Fhl1,Hbegf,Ltbp3,Ddah1,Svep1,Cnksr1,Nppb,Arpc1b,Medag,Gxylt2,Mgp,Ift122,Comt,Meox1,Rhoc,Nox4,Nupr1,Msn,Tnmd,Srpx2,Sfrp1,Adcy7,Gnao1,Gpx1,Fbln2,F2r,Tmsb4x,Nlrc3,Sprr1a,Map1b,Tmem119,Col8a2,Piezo2,Tspo,Mfap4,Cox19,Otulin,Rbp1,Lgals1,Flnc,Fndc1,Qsox1,Loxl2,Adamtsl2,Adamts2,Pmepa1,Gdf15,Atp6v0a4,Tlr4,Col16a1,Nbl1,Dhdds,Etv5,Pcolce2,Sulf1,Mafk,Pmp22,Gpx3,Scn1b,Igf1,Fbln5,Hsp90aa1,Pdlim2,Shisa5,Tspan17,Nabp1,Cd55,Apbb1ip,Itga6,Map1a,Anxa5,Dclk1,Tbx15,Itgb5,Tnfrsf12a,Bambi,Anxa1,Cd63,Lrp8,Mmp23,Cdkl2,Ptn,Col6a1,Grk5,Gab2,Cd44,Slc1a3,Nid1,Aqp8,Ap1s2,Star,Tpm4,Anxa2,Dnaja4,Col12a1,Dync1li1,Rasl11b,Cx3cr1,Junb,Spcs3,Actn4,Lman1l,Rab31,Maff,Abra,Tuba1c,Naalad2,Tubb2b,Nudt18,Dipk2a,Ppm1e,Rhoj,Tecpr1,Scx,Pkd2,Grip1,Ssc5d,Haus8,Pcdh17,Igsf10,Lum,Cavin3,Enpp1,Serpine1,Prkab2,Lpar1,Mybpc2,Myl6,Eid1,Tmsb10,2410006H16Rik,Ddah2,Carhsp1,Dynll1,Fxyd5,Kdelr3,Bicc1,Pls3,Ptgis,Ro60,Mical1,Mrc2,Rflnb,Hif1a,Sfxn1,Atp8a2,Dpysl2,Sorbs3,Serpine2,Tpm3,Hes1,Masp1,Runx1,Adamts10,Rab27b,Ppic,Acot9,Gpatch4,Rnf115,Ctsk,Pdpn,Emilin1,Foxp2,Fscn1,Tspan9,Ckb,Sh3bgrl,Gpm6b,Rrad,Psmb10,Panx1,Mcam,Itga11,Lmo2,Pkd1,Bak1,Ptk2b,Irak4,Mmgt2,Myof,Calhm5,Cpne8,Gas1,Mllt11,Cnn3,C1ra,Pla2g4a,Fmod,Prelp,Amot,Phlda3,S100a10,Serpinb6b,Aplnr,Spsb4,Col6a3,Dok1,Cebpd,Sod3,Phldb2,Zfp267,Rtkn,Rrp12,Tacc3,Mical2,Tsr1,Rras,Txnip,Atp8b1,Ifi27l2a,Xirp1,Clic1,Tgfbr1,Fcrl2,P4ha1,Ntn4,Egfr,Csrp2,Adarb1,Aebp1,Id2,Galc,Nin,Traf3,Syk,Nkd2,Prkcd,Tars,Slc38a2,Sdc3,Il1r1,Tnfrsf11a,Shox2,Lima1,Tspan5,Hacd4,Tnfrsf1b,Prkag2,Srsf9,Adcyap1r1,Zyx,Bhlhe40,Tnfrsf1a,Cd9,Mmp14,Il17ra,Plod3,Ccn4,Nucb2,Il4ra,Rgs10,Cttn,Pdlim3,Mt2,Ldlr,Chpf,Septin11,Tubb2a,Arl4c,Lgals3,Rab7b,Creb5,Gemin6,Inhba,Ctla2a,Zbtb7c,Col27a1,Trim16,Ino80c,Col4a4,Sp110,Dnm3os,Plcg2,Dbn1,Sema3f,Rap2b,Eef1a1,Cntln,Creb3l2,Dsel,Dap,Isg20,Zdhhc2,Vasn,Thbs1,Emp3,Ildr2,Ccl21a,Ccr5,Col4a3,Snord13,Pou2f2,Lrrk1,Lbp,Rcn3,Nav3,Phlda1,Upp1,Tshz3,Cd180,Gpx8,Bmp4,Slc25a30,Ednrb,Matn2,Ecrg4,Mgat4a,Ifi211,Niban2,Lhx6,Tubgcp4,Skil,Ptgfrn,Tfrc,Pros1,Fmnl3,Clec4n,Slc39a6,Myot,Mapk4,Aspscr1,Gba,Glipr2,Cda,Eln,Wnt5b,Sox9,Sez6,Usp32,Rab34,Relb,Chn2,Cnn2,Zfp626,Arhgap17,Tgfb1i1,Ldaf1,Mki67,Ophn1,Fgfr1,Cx3cl1,Cotl1,Nudt16,Arap1,Atxn7l3,Cttnbp2nl,Numbl,Fzd2,Arfgap3,Pcdh9,Mcm3,S1pr2,Dact1,Shb,Zfp316,Slitrk4,Ankrd23,Ptprf,Vat1,Abi3bp,Sbno2,Iqce,Dchs1,Tnfrsf23,P3h2,Rbms3,Ptger4,Sema3d,Ms4a6c,Chaserr | P3h4,Atp1a2,Rbfox1,Tbx5,Acadvl,Unc45b,Acot2,Entpd5,Aldh6a1,Mtr,Fbp2,Fitm1,Ttll1,Hadha,Adhfe1,Epha4,Rgs2,Cenpf,Kcnj3,Slc25a12,Sord,Acss1,P2ry1,Ppm1l,Hadh,Oplah,Atp5pf,Ndufa5,Lrpprc,Eci1,Pfdn6,Syt7,Kcnip2,Decr1,Cpt2,Pink1,Atp2a2,Ift81,Gstk1,Rtn2,Tcea3,Rpl3l,Efnb3,Akt2,Etfb,Pex11a,Stard10,Dgat2,Ndufb11,Slc25a4,Mmp15,Bckdhb,Dhrs7c,Ces1d,Hopx,Eno3,Retnla,mt-Nd5,Mlf1,Adra1b,Ech1,Lgals4,Pla2g5,Lgr6,Gal3st3,Cox7a1,Fam174b,Tnni3,Acaa2,Apbb1,Slc20a2,Ppm1k,Ano10,Wnk2,Hjv,Car14,Pdk2,Mrps35,Cmtm8,Strit1,Osgep,Gcat,Slc41a1,Klhl3,Pdcd2,Lama5,Cenpv,Ybx2,Slc25a22,Isyna1,Mtif2,Mif4gd,Coro6,Dglucy,Rgs7bp,Opn4,Ogdhl,Spta1,Lamb3,Aldh9a1,Eif3m,Bcl2l11,Slc22a3,Pim1,Emilin2,Anks1,Impa2,Camk2a,Syvn1,Pola2,Cyp4b1,Ablim2,Clcn1,Sbk2,Dbt,Crhr2,Ruvbl2,Gstm7,Col5a3,Fah,Tnni2,Stard8,Slc27a1,Kcnj5,Tmed1,Hcn4,Hhatl,Bcl11b,Pdp2,Foxo6,Ggcx,Gzmm,Mgmt,Slc7a1,Kcnj2,Mapk1ip1,Gpr22,Mylk4,Penk,Nqo2,Lrrc4b,Helt,Dusp18,Zfp358,Kcnv2,Hes6,Selenbp1,Acot1,Pde11a,Gramd4,Phpt1,Syde2,Apln,Ctnnal1,Whrn,Prdm16,Kcne1,Kyat3,Hsbp1l1,Snhg14,Meis1,Adora2a,Ccl11,Ston2,Sema4d,Tppp,Enpp2,Alox5,Esrrg,Emc4,Mme,Gpt,Sharpin,Ppil1,Carnmt1,Cryz,Aqp7,Rps6,Spa17,Slc25a42,Pex6,Ercc1,Gpt2,Il15,Adamts7,Nme6,Acbd4,Rnf207,Nectin2,Sox6,Dnaaf3,Cngb3,Wrap53,Preb,Adra1a,Scn4b,Spc24,Qsox2,Wdr45,Kyat1,Neurl2,Maob |
| 18 | regulation of biological quality | Kif5b,Dio2,Plekho1,Sparc,Dcn,Rtn4,Prkar1a,Ace,Samd4,Ptprn,Cfh,Vim,Edn3,Postn,App,Fhl1,Serping1,Myl12a,Ddah1,Svep1,Col1a2,Comt,Msn,Srpx2,Sfrp1,Mmp2,Gnao1,Comp,Bcl2,F2r,Tmsb4x,Map1b,Myh7,Nppa,Tspo,Rbp1,Atp6v0a4,Itga9,Ltbp4,Prnp,Fbln1,Carhsp1,Dynll1,Etv5,Scn1b,Igf1,Hif1a,Hsp90aa1,Syk,Atp8a2,Fn1,Serpine2,Cd55,Map1a,Anxa5,Tnfrsf12a,Bambi,Anxa1,Ctsk,Pdpn,Lrp8,Nppb,Emilin1,Ptn,Tspan9,Scpep1,Plod3,Star,Anxa2,Pkd1,Bak1,Septin11,Ptk2b,Gpx1,Cx3cr1,Mllt11,Pla2g4a,Piezo2,Amot,Aplnr,Rhoj,Sod3,Pkd2,Grip1,Serpine1,Lpar1,Tlr4,Atp8b1,Ccl21a,Tmsb10,Clic1,Lbp,Egfr,Id2,Bmp4,Prkcd,Ednrb,Ecrg4,Niban2,Shox2,Pros1,Fmnl3,Lima1,Gba,Tnfrsf1b,Eln,Adcyap1r1,Cd9,Sez6,Nucb2,Cttn,Ophn1,Fgfr1,Cx3cl1,Cotl1,Arap1,Numbl,Fzd2,Inhba,S1pr2,Dact1,Slitrk4,Ptprf,Plcg2,Dbn1,Sema3f,Abi3bp,Rap2b,Zdhhc2,Ptger4,Thbs1,Sema3d,Ildr2,Ccr5 | Atp1a2,Tbx5,Slc25a22,Adora2a,Ccl11,Sema4d,Rgs7bp,Alox5,Epha4,Rgs2,Spta1,Kcnj3,Bcl2l11,P2ry1,Mme,Hadh,Atp5pf,Slc22a3,Pim1,Emilin2,Camk2a,Syt7,Syvn1,Kcnip2,Aqp7,Pink1,Atp2a2,Clcn1,Pex6,Crhr2,Efnb3,Akt2,Pex11a,Dgat2,Slc25a4,Kcnj5,Hcn4,Ces1d,Adra1b,Kcnj2,Adra1a,Scn4b,Lrrc4b,Tnni3,Acaa2,Apln,Ppm1k,Kcne1 |
| 19 | positive regulation of multicellular organismal process | Abi3bp,Amot,Aplnr,Bmp4,Ccl21a,Ccn4,Ccr5,Cd55,Cttn,Cx3cl1,Cx3cr1,Ednrb,Egfr,Etv5,F2r,Fgfr1,Gba1,Glipr2,Gpm6b,Hes1,Hif1a,Id2,Il1r1,Il4ra,Il17ra,Inhba,Lbp,Lrp8,Map1b,Mmp14,Nin,Numbl,Pdpn,Pla2g4a,Plcg2,Pou2f2,Prkab2,Ptger4,Ptgis,Ptk2b,Ptprf,Rras,Runx1,Scx,Serpine2,Shb,Shox2,Skil,Slitrk4,Sox9,Star,Syk,Tfrc,Tgfb1i1,Tgfbr1,Thbs1,Tlr4,Tnfrsf1a,Tnfrsf1b,Tnfrsf11a,Tnfrsf12a,Traf3,Ace,Anxa1,Anxa2,App,Atp8a2,Bambi,Bcl2,Ccn2,Ccnd2,Cd34,Clec4n,Col1a1,Dbn1,Ddah1,Ecrg4,Edn3,Emilin1,Fn1,Grip1,Hsp90aa1,Hspb6,Igf1,Lgals1,Loxl2,Ltbp3,Lum,Nppa,Nppb,Panx1,Postn,Ptn,Rab7b,Rtn4,Serpine1,Serpinf1,Sfrp2,Srpx2,Sulf1,Svep1,Tgfb2,Tgfb3,Tgm2,Tmem119,Trim16,Tspo,Vim | Tbx5,Adora2a,Ccl11,Sema4d,Tppp,Enpp2,Alox5,Epha4,Rgs2,Spta1,Esrrg,Slc25a12,P2ry1,Mme,Hadh,Atp5pf,Pim1,Emilin2,Decr1,Cpt2,Crhr2,Efnb3,Slc25a4,Il15,Slc27a1,Nectin2,Sox6,Slc7a1,Penk,Adra1a,Lrrc4b,Apln,Slc20a2,Prdm16 |
| 20 | regulation of multicellular organismal process | Ccnd2,Cd34,Col14a1,Cygb,Fgl2,Gnao1,Igfbp5,Itga9,Lox,Loxl3,Mmp2,Prnp,Rbp1,Serpinf1,Sfrp1,Sparc,Srpx2,Tgfb2,Tgm2,Timp1,Vim,Angptl7,Aspn,Bcl2,Ccn2,Col1a1,Col4a2,Comp,Dcn,Fbn1,Hspb6,Lrrc17,Myh7,Nppa,Pi16,Postn,Rtn4,Serping1,Sfrp2,Thbs4,Adcy7,Anxa2,Bambi,Cd63,Cx3cr1,F2r,Fbln1,Frzb,Gdf15,Lrp8,Ltbp3,Lum,Maff,Nppb,Prkab2,Ptn,Sulf1,Tgfb3,Tlr4,Tnfrsf12a,Ace,Apod,App,Ddah1,Dnaja4,Edn3,Fn1,Fstl3,Hbegf,Lgals1,Loxl2,Map1b,Mgp,Nlrc3,Nupr1,Prkar1a,Svep1,Tmem119,Tnmd,Tspo,Anxa5,Aplnr,Ccl21a,Ccn4,Col4a3,Ctsk,Fbln5,Gpm6b,Hes1,Hif1a,Lmo2,Ntn4,Pdpn,Pla2g4a,Plcg2,Ptgis,Ptk2b,Rras,Runx1,S100a10,Serpine2,Syk,Amot,Anxa1,Atp8a2,Cd55,Emilin1,Etv5,Grip1,Hsp90aa1,Igf1,Panx1,Phldb2,Rflnb,Rhoj,Scn1b,Scx,Serpine1,Ssc5d,Star,Tgfbr1,Pou2f2,Lbp,Egfr,Nav3,Id2,Nin,Traf3,Bmp4,Prkcd,Ednrb,Ecrg4,Il1r1,Tnfrsf11a,Skil,Shox2,Tfrc,Pros1,Clec4n,Gba,Glipr2,Tnfrsf1b,Bhlhe40,Tnfrsf1a,Cd9,Sox9,Mmp14,Il17ra,Relb,Il4ra,Tgfb1i1,Cttn,Fgfr1,Cx3cl1,Ldlr,Numbl,Lgals3,Rab7b,Inhba,S1pr2,Ctla2a,Shb,Slitrk4,Trim16,Ino80c,Ptprf,Dbn1,Sema3f,Abi3bp,Vasn,Ptger4,Thbs1,Sema3d,Ildr2,Ccr5 | Adamts7,Adora2a,Adra1a,Alox5,Bcl2l11,Ccl11,Enpp2,Esrrg,Hcn4,Il15,Kcnj2,Kcnj5,Lama5,Meis1,Mme,Nectin2,P2ry1,Penk,Pim1,Ruvbl2,Scn4b,Sema4d,Slc27a1,Sox6,Spta1,Tbx5,Tppp,Adra1b,Apln,Atp1a2,Atp2a2,Atp5pf,Cpt2,Crhr2,Decr1,Efnb3,Emilin2,Epha4,Hadh,Helt,Hes6,Hopx,Kcne1,Kcnip2,Lrrc4b,Prdm16,Rgs2,Rnf207,Slc7a1,Slc20a2,Slc25a4,Slc25a12,Strit1,Syt7,Tnni3 |

**Table S4.** Common Genes expressed in negative enriched biological process

|  | Term name | Gene in WT TAC vs WT sham | Gene in R14Δ/+ TAC vs R14Δ/+ sham |
| --- | --- | --- | --- |
| 1 | monocarboxylic acid metabolic process | Abcd1,Acot1,Adh1,Akt2,Aldob,Appl2,Cbfa2t3,Cpt2,Etfdh,Flcn,Gcdh,Kyat1,Lipe,Mapk14,Npc1,Nudt7,Pfkfb1,Ppara,Ppargc1a,Prkab1,Scd4,Slc27a1,Sord,Acaa2,Acacb,Acad11,Acadm,Acadvl,Acot2,Acss1,Aldh5a1,Angptl3,Ces1d,Crat,Decr1,Dgat2,Ech1,Echs1,Eci1,Eno3,Etfb,Gstm7,Hadh,Hadha,Ldhb,Plin5 | Acaa2,Acadvl,Acbd4,Acot1,Akt2,Alox5,Cpt2,Fah,Gstm7,Kyat1,Pdk2,Slc27a1,Sord,Acot2,Acss1,Ces1d,Decr1,Dgat2,Ech1,Eci1,Eno3,Etfb,Hadh,Hadha,Slc25a12 |
| 2 | monocarboxylic acid catabolic process | Abcd1,Acaa2,Acad11,Akt2,Cpt2,Crat,Etfdh,Gcdh,Lipe,Nudt7,Sord,Acacb,Acadm,Acadvl,Acot2,Ces1d,Decr1,Ech1,Echs1,Eci1,Etfb,Hadh,Hadha,Plin5 | Etfb,Acaa2,Acadvl,Akt2,Cpt2,Decr1,Fah,Hadh,Sord,Acot2,Ces1d,Ech1,Eci1,Hadha |
| 3 | cardiac muscle contraction | Adra1a,Adra1b,Cacnb2,Ctnna3,Dsg2,Fgf13,Hcn4,Kcne1,Kcnh2,Kcnj2,Kcnj5,Kcnq1,Rgs2,Rnf207,Abcc9,Atp2a2,Myh6,Ryr2,Scn4b,Smtn,Strit1,Tnni3,Tnni3k | Adra1a,Adra1b,Hcn4,Kcnj2,Kcnj5,Scn4b,Tnni2,Atp1a2,Atp2a2,Kcne1,Rgs2,Rnf207,Strit1,Tnni3 |
| 4 | fatty acid catabolic process | Abcd1,Akt2,Appl2,Cpt2,Etfdh,Gcdh,Mapk14,Ppara,Ppargc1a,Acaa2,Acacb,Acad11,Acadm,Acadvl,Crat,Decr1,Dgat2,Ech1,Echs1,Eci1,Etfb,Hadh,Hadha,Plin5 | Etfb,Acaa2,Acadvl,Akt2,Cpt2,Decr1,Hadh,Acot2,Ces1d,Ech1,Eci1,Hadha |
| 5 | regulation of blood circulation | Adra1a,Adra1b,Agtr1a,Cacnb2,Crhr2,Ctnna3,Dsg2,Fgf13,Hcn4,Kcnd2,Kcne1,Kcnh2,Kcnj2,Kcnj5,Kcnq1,Rgs2,Tbx5,Abcc9,Apln,Atp2a2,Hopx,Hrc,Kcnip2,Myh6,Pik3r1,Rnf207,Ryr2,Scn4b,Slc4a3,Smtn,Strit1,Tnni3,Tnni3k | Adra1a,Adra1b,Alox5,Crhr2,Hcn4,Kcne1,Kcnj2,Kcnj5,Rgs2,Rnf207,Scn4b,Tbx5,Apln,Atp1a2,Atp2a2,Atp5pf,Hopx,Kcnip2,Strit1,Tnni3 |
| 6 | heart process | Adra1a,Adra1b,Cacnb2,Crhr2,Ctnna3,Dsg2,Fgf13,Hcn4,Kcnd2,Kcne1,Kcnh2,Kcnj2,Kcnj5,Kcnq1,Rgs2,Tbx5,Abcc9,Apln,Atp2a2,Hopx,Hrc,Kcnip2,Myh6,Pik3r1,Rnf207,Ryr2,Scn4b,Slc4a3,Smtn,Strit1,Tnni3,Tnni3k | Adra1a,Adra1b,Crhr2,Hcn4,Kcnj2,Kcnj5,Rgs2,Rnf207,Scn4b,Tbx5,Tnni2,Apln,Atp1a2,Atp2a2,Atp5pf,Hopx,Kcne1,Kcnip2,Strit1,Tnni3 |
| 7 | heart contraction | Adra1a,Adra1b,Cacnb2,Crhr2,Ctnna3,Dsg2,Fgf13,Hcn4,Kcnd2,Kcne1,Kcnh2,Kcnj2,Kcnj5,Kcnq1,Rgs2,Tbx5,Abcc9,Apln,Atp2a2,Hopx,Hrc,Kcnip2,Myh6,Pik3r1,Rnf207,Ryr2,Scn4b,Slc4a3,Smtn,Strit1,Tnni3,Tnni3k | Adra1a,Adra1b,Crhr2,Hcn4,Kcnj2,Kcnj5,Rgs2,Rnf207,Scn4b,Tbx5,Tnni2,Apln,Atp1a2,Atp2a2,Atp5pf,Hopx,Kcne1,Kcnip2,Strit1,Tnni3 |
| 8 | small molecule catabolic process | Abcd1,Adh1,Akt2,Aldh2,Aldh6a1,Aldob,Bckdha,Bckdhb,Cpt2,Crat,Dbt,Etfdh,Gcat,Gcdh,Gpt,Kyat1,Lipe,Mccc2,Nqo2,Nudt7,Sord,Acaa2,Acacb,Acad11,Acadm,Acadvl,Acot2,Adhfe1,Aldh5a1,Ces1d,Decr1,Ech1,Echs1,Eci1,Eno3,Etfb,Got1,Hadh,Hadha,Kyat3,Plin5 | Acaa2,Acadvl,Akt2,Cpt2,Dbt,Dhdh,Fah,Gcat,Gpt,Gpt2,Kyat1,Nqo2,Sord,Acot2,Adhfe1,Aldh6a1,Bckdhb,Ces1d,Decr1,Ech1,Eci1,Eno3,Etfb,Hadh,Hadha,Kyat3,Slc25a12 |
| 9 | regulation of heart contraction | Adra1a,Adra1b,Cacnb2,Crhr2,Ctnna3,Dsg2,Fgf13,Hcn4,Kcnd2,Kcne1,Kcnh2,Kcnj2,Kcnj5,Kcnq1,Rgs2,Tbx5,Abcc9,Apln,Atp2a2,Hopx,Hrc,Kcnip2,Myh6,Pik3r1,Rnf207,Ryr2,Scn4b,Slc4a3,Smtn,Strit1,Tnni3,Tnni3k | Adra1a,Adra1b,Crhr2,Hcn4,Kcne1,Kcnj2,Kcnj5,Rgs2,Rnf207,Scn4b,Tbx5,Apln,Atp1a2,Atp2a2,Atp5pf,Hopx,Kcnip2,Strit1,Tnni3 |
| 10 | carboxylic acid catabolic process | Abcd1,Akt2,Aldh6a1,Bckdha,Bckdhb,Cpt2,Crat,Dbt,Etfdh,Gcat,Gcdh,Gpt,Kyat1,Lipe,Mccc2,Nudt7,Sord,Acaa2,Acacb,Acad11,Acadm,Acadvl,Acot2,Adhfe1,Aldh5a1,Ces1d,Decr1,Ech1,Echs1,Eci1,Etfb,Got1,Hadh,Hadha,Kyat3,Plin5 | Acaa2,Acadvl,Akt2,Aldh6a1,Cpt2,Dbt,Fah,Gcat,Gpt,Gpt2,Kyat1,Kyat3,Sord,Acot2,Adhfe1,Bckdhb,Ces1d,Decr1,Ech1,Eci1,Etfb,Hadh,Hadha |
| 11 | organic acid catabolic process | Abcd1,Akt2,Aldh6a1,Bckdha,Bckdhb,Cpt2,Crat,Dbt,Etfdh,Gcat,Gcdh,Gpt,Kyat1,Lipe,Mccc2,Nudt7,Sord,Acaa2,Acacb,Acad11,Acadm,Acadvl,Acot2,Adhfe1,Aldh5a1,Ces1d,Decr1,Ech1,Echs1,Eci1,Etfb,Got1,Hadh,Hadha,Kyat3,Plin5 | Acaa2,Acadvl,Akt2,Aldh6a1,Cpt2,Dbt,Fah,Gcat,Gpt,Gpt2,Kyat1,Kyat3,Sord,Acot2,Adhfe1,Bckdhb,Ces1d,Decr1,Ech1,Eci1,Etfb,Hadh,Hadha |
| 12 | organic acid metabolic process | Abcd1,Acot1,Adh1,Akt2,Aldh6a1,Aldob,Appl2,Bckdha,Carnmt1,Cbfa2t3,Cpt2,D2hgdh,Dbt,Etfdh,Flcn,Gcat,Gcdh,Gnmt,Gpt,Gstm7,Kyat1,Lipe,Mapk14,Mccc2,Npc1,Nudt7,Ogdhl,Pfkfb1,Pla2g5,Ppara,Ppargc1a,Prkab1,Scd4,Slc27a1,Acaa2,Acacb,Acad11,Acadm,Acadvl,Acot2,Acss1,Adhfe1,Aldh5a1,Angptl3,Bckdhb,Carns1,Ces1d,Crat,Decr1,Dgat2,Dglucy,Ech1,Echs1,Eci1,Eno3,Etfb,Got1,Hadh,Hadha,Kyat3,Ldhb,Plin5,Sord,Thap4 | Acaa2,Acbd4,Acot1,Akt2,Alox5,Carnmt1,Cpt2,Dbt,Fah,Gcat,Gpt,Gpt2,Gstm7,Kyat1,Mtr,Ogdhl,Pdk2,Pla2g5,Slc27a1,Sord,Acadvl,Acot2,Acss1,Adhfe1,Aldh6a1,Bckdhb,Ces1d,Decr1,Dgat2,Dglucy,Ech1,Eci1,Eno3,Etfb,Hadh,Hadha,Kyat3,Slc25a12 |
| 13 | oxoacid metabolic process | Abcd1,Acot1,Adh1,Akt2,Aldh6a1,Aldob,Appl2,Bckdha,Carnmt1,Cbfa2t3,Cpt2,D2hgdh,Dbt,Etfdh,Flcn,Gcat,Gcdh,Gnmt,Gpt,Gstm7,Kyat1,Lipe,Mapk14,Mccc2,Npc1,Nudt7,Ogdhl,Pfkfb1,Pla2g5,Ppara,Ppargc1a,Prkab1,Scd4,Slc27a1,Acaa2,Acacb,Acad11,Acadm,Acadvl,Acot2,Acss1,Adhfe1,Aldh5a1,Angptl3,Bckdhb,Carns1,Ces1d,Crat,Decr1,Dgat2,Dglucy,Ech1,Echs1,Eci1,Eno3,Etfb,Got1,Hadh,Hadha,Kyat3,Ldhb,Plin5,Sord,Thap4 | Acaa2,Acbd4,Acot1,Akt2,Alox5,Carnmt1,Cpt2,Dbt,Fah,Gcat,Gpt,Gpt2,Gstm7,Kyat1,Mtr,Ogdhl,Pdk2,Pla2g5,Slc27a1,Sord,Acadvl,Acot2,Acss1,Adhfe1,Aldh6a1,Bckdhb,Ces1d,Decr1,Dgat2,Dglucy,Ech1,Eci1,Eno3,Etfb,Hadh,Hadha,Kyat3,Slc25a12 |
| 14 | carboxylic acid metabolic process | Abcd1,Acot1,Adh1,Akt2,Aldh6a1,Aldob,Appl2,Bckdha,Carnmt1,Cbfa2t3,Cpt2,D2hgdh,Dbt,Etfdh,Flcn,Gcat,Gcdh,Gnmt,Gpt,Gstm7,Kyat1,Lipe,Mapk14,Mccc2,Npc1,Nudt7,Ogdhl,Pfkfb1,Pla2g5,Ppara,Ppargc1a,Prkab1,Scd4,Slc27a1,Acaa2,Acacb,Acad11,Acadm,Acadvl,Acot2,Acss1,Adhfe1,Aldh5a1,Angptl3,Bckdhb,Carns1,Ces1d,Crat,Decr1,Dgat2,Dglucy,Ech1,Echs1,Eci1,Eno3,Etfb,Got1,Hadh,Hadha,Kyat3,Ldhb,Plin5,Sord,Thap4 | Acaa2,Acbd4,Acot1,Akt2,Alox5,Carnmt1,Cpt2,Dbt,Fah,Gcat,Gpt,Gpt2,Gstm7,Kyat1,Mtr,Ogdhl,Pdk2,Pla2g5,Slc27a1,Sord,Acadvl,Acot2,Acss1,Adhfe1,Aldh6a1,Bckdhb,Ces1d,Decr1,Dgat2,Dglucy,Ech1,Eci1,Eno3,Etfb,Hadh,Hadha,Kyat3,Slc25a12 |
| 15 | small molecule metabolic process | Abcd1,Acot1,Adh1,Akt2,Aldh2,Aldh6a1,Aldob,Appl2,Bckdha,Car14,Carnmt1,Cbfa2t3,Cpt2,D2hgdh,Dbt,Dut,Etfdh,Fbp2,Flcn,Gcat,Gcdh,Gnmt,Gpt,Hectd4,Hmgcs2,Hsd11b1,Kcnq1,Kyat1,Lipe,Mapk14,Mccc2,Mme,Nadk2,Naprt,Npc1,Nqo2,Ogdhl,P2ry1,Pde4a,Pdss2,Pfkfb1,Ppara,Ppargc1a,Prkab1,Scd4,Slc25a42,Slc27a1,Acaa2,Acacb,Acad11,Acadm,Acadvl,Acot2,Acss1,Adhfe1,Aldh5a1,Angptl3,Bckdhb,Carns1,Ces1d,Crat,Decr1,Dgat2,Dglucy,Ech1,Echs1,Eci1,Eno3,Entpd5,Etfb,Fitm2,Got1,Gstm7,Hadh,Hadha,Impa2,Isyna1,Kyat3,Ldhb,Myh6,Nudt7,Oard1,Pank1,Pik3r1,Pla2g5,Plin5,Ppip5k2,Retsat,Sord,Stard3,Thap4 | Acbd4,Acot1,Akt2,Alox5,Car14,Carnmt1,Cpt2,Dbt,Dhdh,Entpd5,Fah,Gcat,Gpt,Gpt2,Isyna1,Kyat1,Mme,mt-Nd5,Mtr,Ndufb11,Nqo2,Ogdhl,P2ry1,Pdk2,Pla2g5,Slc25a42,Slc27a1,Sord,Acaa2,Acadvl,Acot2,Acss1,Adhfe1,Aldh6a1,Atp1a2,Atp5pf,Bckdhb,Ces1d,Decr1,Dgat2,Dglucy,Ech1,Eci1,Eno3,Etfb,Fbp2,Ggcx,Gstm7,Hadh,Hadha,Impa2,Kyat3,Ndufa5,Nme6,Slc25a12 |
