# Supplementary material for: Cardiac remodeling pathways do not accelerate disease onset and severity in a mouse model of PLN-R14del cardiomyopathy
Source: Research Square preprint supplement (doi:10.21203/rs.3.rs-7019046/v1), 2025-07-23

## Total protein staining

Batch1

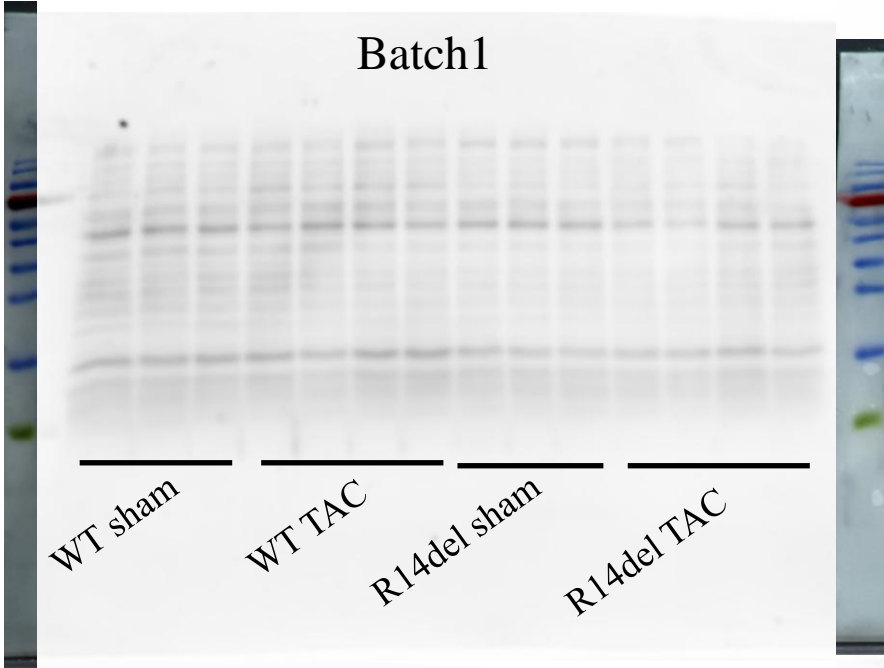

Batch2

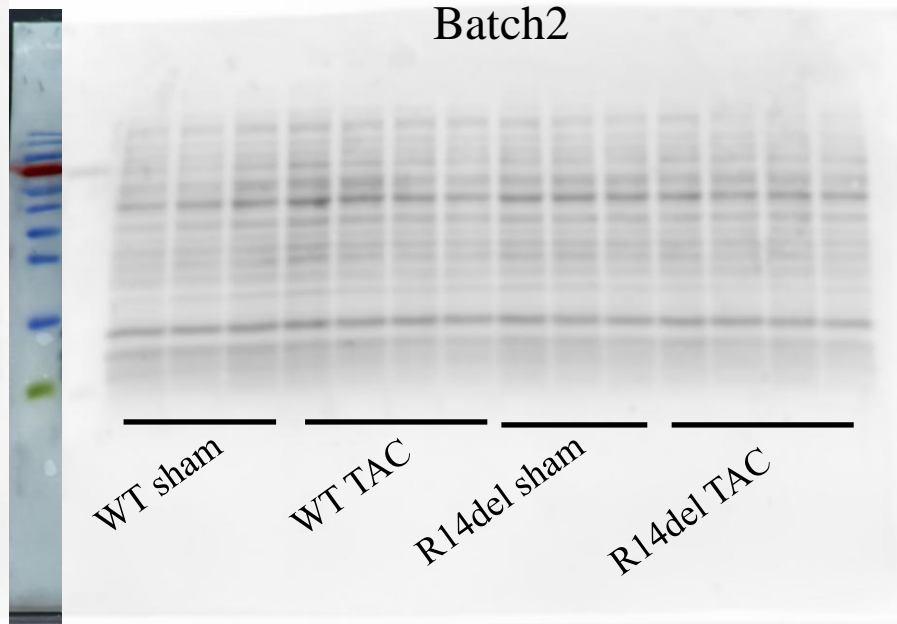

Batch3

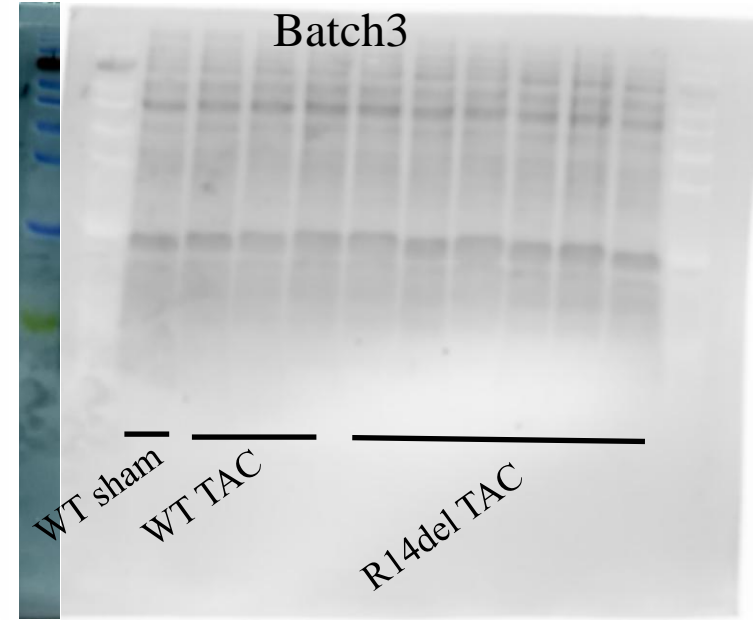

Representative blot  
Batch1

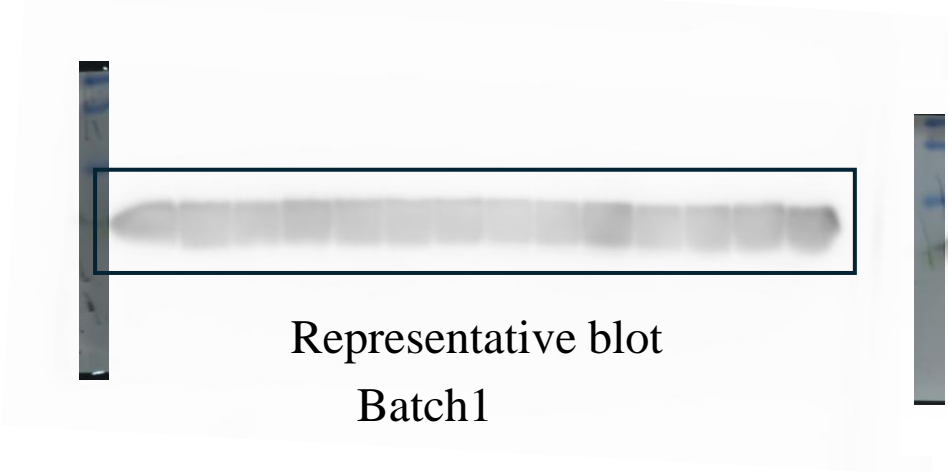

PLN blots

Batch2

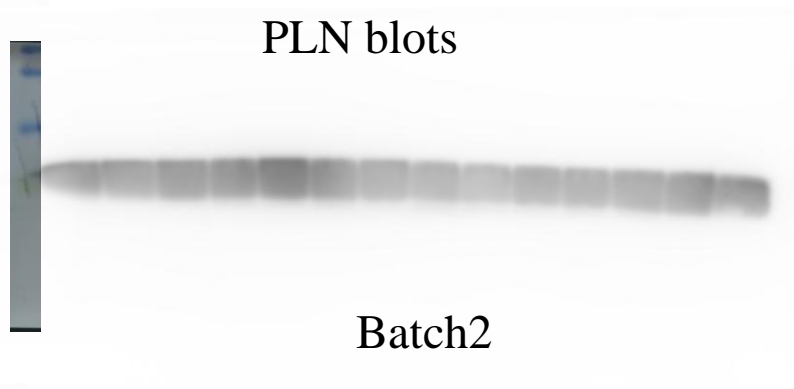

Batch3

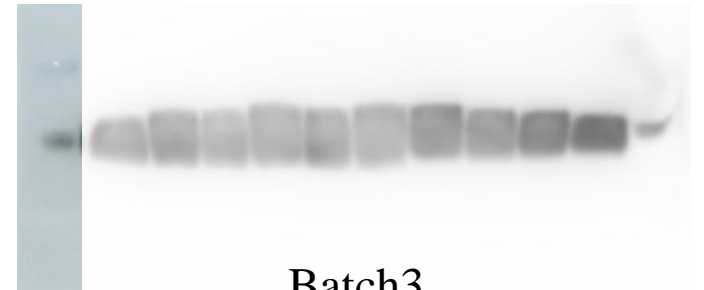

Total protein staining

Batch1

Batch2

Batch3

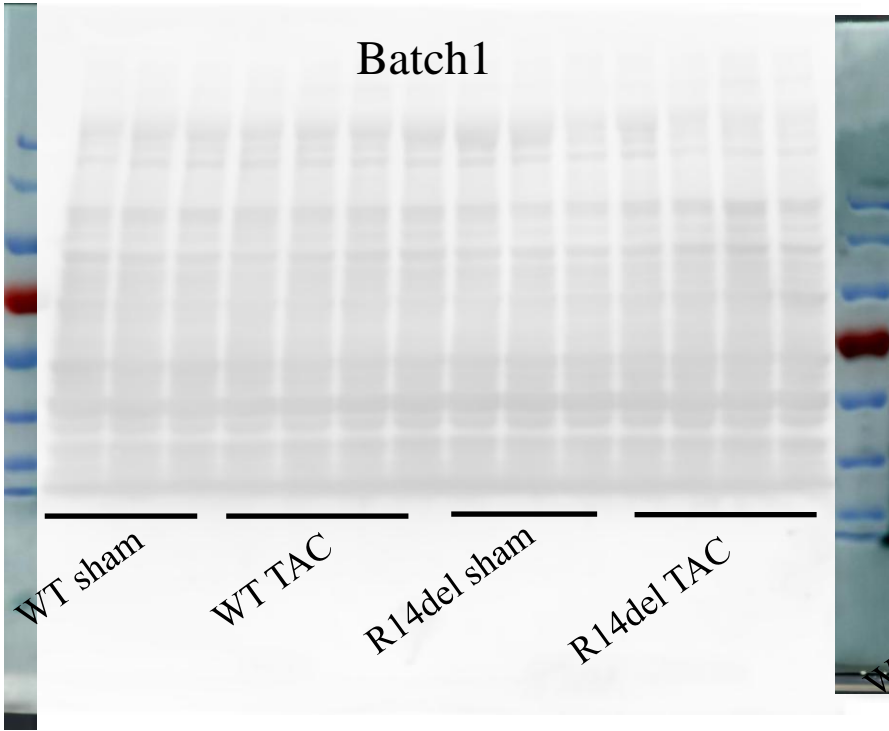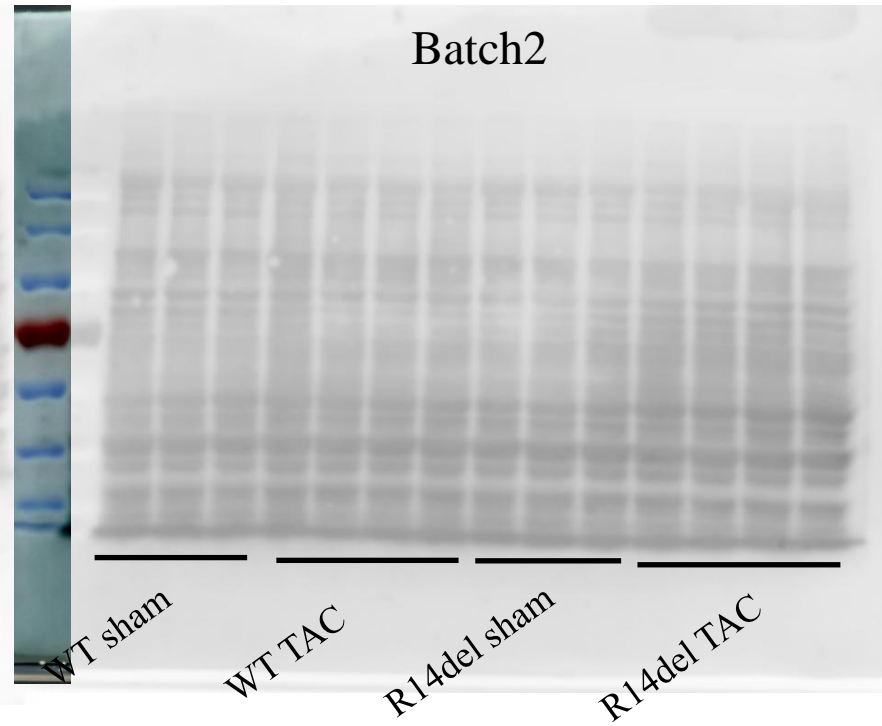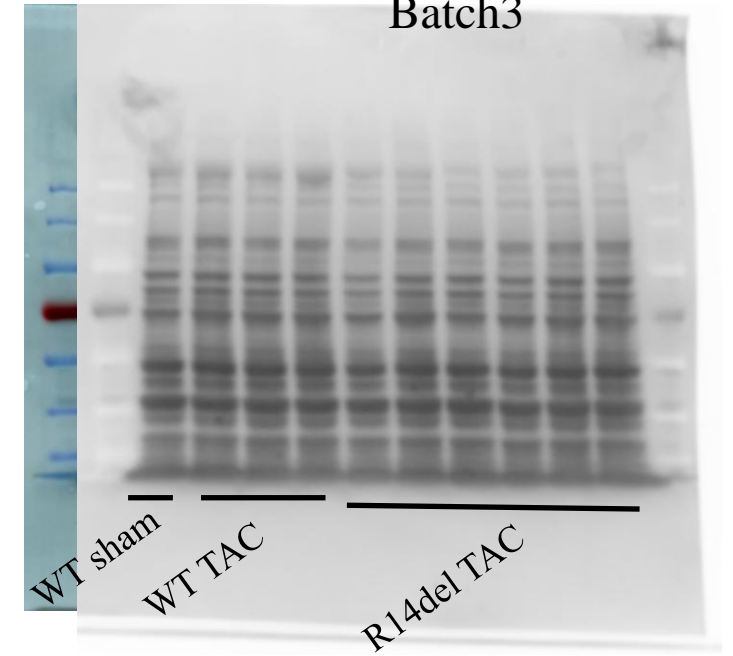

SERCA blots

Representative blot

Batch1

Batch2

Batch3

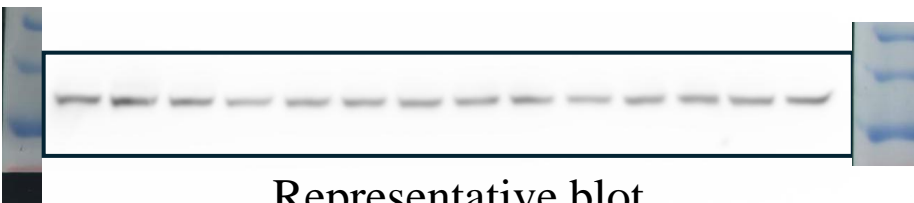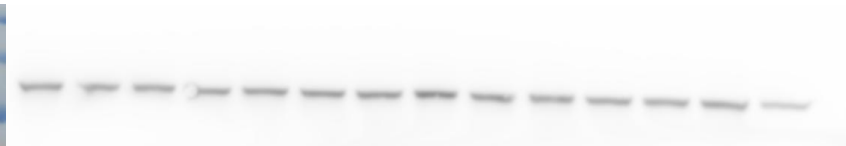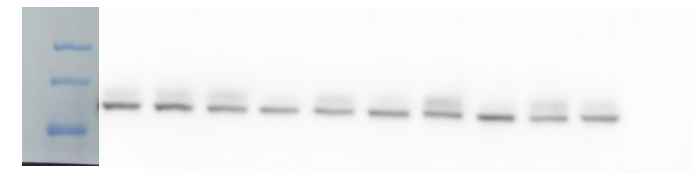

Supplement: Supplementary file 1 [file c57dc83ba2f9dc2979f6df27.pdf]
